# Supplementary material for: Effect of dapagliflozin on kidney and cardiovascular outcomes by baseline KDIGO risk categories: a post hoc analysis of the DAPA-CKD trial
Source: PubMed Central journal article supplement (PMC9174107; doi:10.1007/s00125-022-05694-6), 2022-04-21
Supplement: 125_2022_5694_MOESM1_ESM.pdf [file 125_2022_5694_MOESM1_ESM.pdf]

**ESM Table 1: Baseline characteristics by baseline subgroup of UACR and eGFR**

|                                                             | UACR categories (mg/g) |                   |              |             | eGFR categories (ml min <sup>-1</sup> [1.73 m] <sup>-2</sup> ) |              |              |             |
|-------------------------------------------------------------|------------------------|-------------------|--------------|-------------|----------------------------------------------------------------|--------------|--------------|-------------|
|                                                             | ≤1000                  | >1000 to<br>≤3500 | >3500        | p<br>value* | ≥45                                                            | ≥30 to <45   | <30          | p<br>value* |
| Number of patients, n (%)                                   | 2225 (51.7%)           | 1764 (41.0%)      | 315 (7.3%)   |             | 1782 (41.4)                                                    | 1898 (44.1)  | 624 (14.5)   |             |
| Mean age, years (SD)                                        | 62.7 (12.2)            | 61.0 (12.2)       | 60.1 (10.7)  | <0.001      | 61.4 (11.8)                                                    | 62.1 (12.4)  | 62.3 (12.1)  | 0.12        |
| Female sex, n (%)                                           | 723 (32.5)             | 581 (32.9)        | 121 (38.4)   | 0.11        | 563 (31.6)                                                     | 637 (33.6)   | 225 (36.1)   | 0.11        |
| Race, n (%)                                                 |                        |                   |              | <0.001      |                                                                |              |              | 0.08        |
| White                                                       | 1238 (55.6)            | 915 (51.9)        | 137 (43.5)   |             | 942 (52.9)                                                     | 1013 (53.4)  | 335 (53.7)   |             |
| Black                                                       | 104 (4.7)              | 75 (4.2)          | 12 (3.8)     |             | 80 (4.5)                                                       | 88 (4.6)     | 23 (3.7)     |             |
| Asian                                                       | 760 (34.2)             | 609 (34.5)        | 98 (31.1)    |             | 590 (33.1)                                                     | 668 (35.2)   | 209 (33.5)   |             |
| Other                                                       | 123 (5.5)              | 165 (9.3)         | 68 (21.6)    |             | 170 (9.5)                                                      | 129 (6.8)    | 57 (9.1)     |             |
| Mean BMI, kg/m <sup>2</sup> (SD)                            | 29.5 (6.1)             | 29.6 (6.2)        | 29.5 (6.3)   | 0.88        | 29.5 (6.0)                                                     | 29.6 (6.2)   | 29.3 (6.4)   | 0.59        |
| Current smoker, n (%)                                       | 269 (12.1)             | 264 (15.0)        | 51 (16.2)    | 0.03        | 265 (14.9)                                                     | 232 (12.2)   | 87 (13.9)    | 0.08        |
| Mean blood pressure, mmHg (SD)                              |                        |                   |              |             |                                                                |              |              |             |
| Systolic                                                    | 134.2 (16.6)           | 139.3 (17.8)      | 144.9 (16.7) | <0.001      | 136.9 (16.8)                                                   | 136.9 (17.4) | 138.2 (18.8) | 0.23        |
| Diastolic                                                   | 76.4 (10.4)            | 78.6 (10.5)       | 79.6 (9.7)   | <0.001      | 78.1 (10.1)                                                    | 77.1 (10.7)  | 77.1 (11.0)  | 0.007       |
| Mean eGFR, ml min <sup>-1</sup> [1.73 m] <sup>-2</sup> (SD) | 44.0 (12.2)            | 42.5 (12.4)       | 40.6 (12.4)  | <0.001      | 55.3 (8.1)                                                     | 37.0 (4.3)   | 26.8 (1.8)   | <0.001      |
| Mean HbA1c, mmol/mol (SD)                                   | 53 (18.6)              | 54 (18.6)         | 60 (20.8)    |             | 56 (19.7)                                                      | 53 (18.6)    | 50 (16.4)    |             |
| Mean HbA1c, % (SD)                                          | 7.0 (1.7)              | 7.1 (1.7)         | 7.6 (1.9)    | <0.001      | 7.3 (1.8)                                                      | 7.0 (1.7)    | 6.7 (1.5)    | <0.001      |
| Haemoglobin, g/l (SD)                                       | 130 (17)               | 128 (19)          | 121 (18)     | <0.001      | 133 (18)                                                       | 126 (17)     | 120 (16)     | <0.001      |

|                                        |                      |                         |                         |        |                       |                        |                        |        |
|----------------------------------------|----------------------|-------------------------|-------------------------|--------|-----------------------|------------------------|------------------------|--------|
| Median UACR, mg/g (IQR)                | 488 (326–<br>697)    | 1744 (1310–<br>2394)    | 4127 (3810–<br>4628)    | <0.001 | 856 (434–<br>1710)    | 962 (491–<br>1926)     | 1235 (588–<br>2376)    | <0.001 |
| Median UACR, mg/mmol (IQR)             | 55.1 (36.8–<br>78.7) | 197.1 (148.0–<br>270.5) | 466.4 (430.5–<br>523.0) | <0.001 | 96.7 (49.0–<br>193.2) | 108.7 (55.5–<br>217.6) | 139.6 (66.4–<br>268.5) | <0.001 |
| Type 2 diabetes, n (%)                 | 1433 (64.4)          | 1204 (68.2)             | 269 (85.4)              | <0.001 | 1266 (71.0)           | 1239 (65.3)            | 401 (64.3)             | <0.001 |
| Cardiovascular disease, n (%)          | 815 (36.6)           | 669 (37.9)              | 126 (40.0)              | 0.43   | 669 (37.5)            | 710 (37.4)             | 231 (37.0)             | 0.97   |
| Medications, n (%)                     |                      |                         |                         |        |                       |                        |                        |        |
| ACE inhibitor / ARB                    | 2160 (97.1)          | 1712 (97.0)             | 302 (95.9)              | 0.49   | 1749 (98.1)           | 1837 (96.8)            | 588 (94.2)             | <0.001 |
| Diuretics                              | 942 (42.3)           | 782 (44.3)              | 158 (50.2)              | 0.03   | 672 (37.7)            | 880 (46.4)             | 330 (52.9)             | <0.001 |
| GLP-1 receptor agonists <sup>†</sup>   | 53 (3.7)             | 55 (4.6)                | 14 (5.2)                | 0.37   | 47 (3.7)              | 60 (4.8)               | 15 (3.7)               | 0.33   |
| Mineralocorticoid receptor antagonists | 105 (4.7)            | 101 (5.7)               | 23 (7.3)                | 0.10   | 92 (5.2)              | 113 (5.9)              | 24 (3.8)               | 0.12   |
| Statin, n (%)                          | 769 (34.5)           | 660 (37.4)              | 169 (53.6)              | <0.001 | 652 (36.6)            | 725 (38.2)             | 221 (35.4)             | 0.38   |

ACE = angiotensin-converting enzyme; ARB = angiotensin receptor blocker; BMI = body mass index; eGFR = estimated glomerular filtration rate;

GLP-1 = glucagon-like peptide 1; HbA1c = glycated haemoglobin; UACR = urinary albumin:creatinine ratio.

\*Statistically significant differences across the 3 strata of baseline UACR or eGFR.

<sup>†</sup>Only in patients with diabetes (N=2,906)

**ESM Fig 1: Effects of dapagliflozin across subgroups of UACR, eGFR and KDIGO risk categories in patients with (a) and without diabetes (b)**

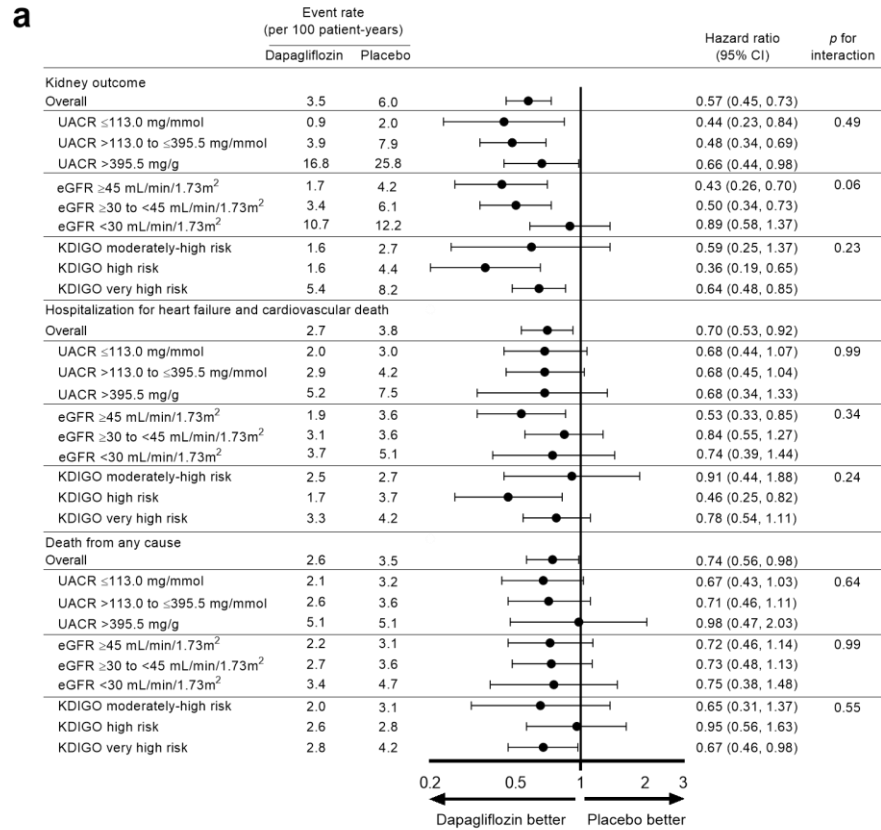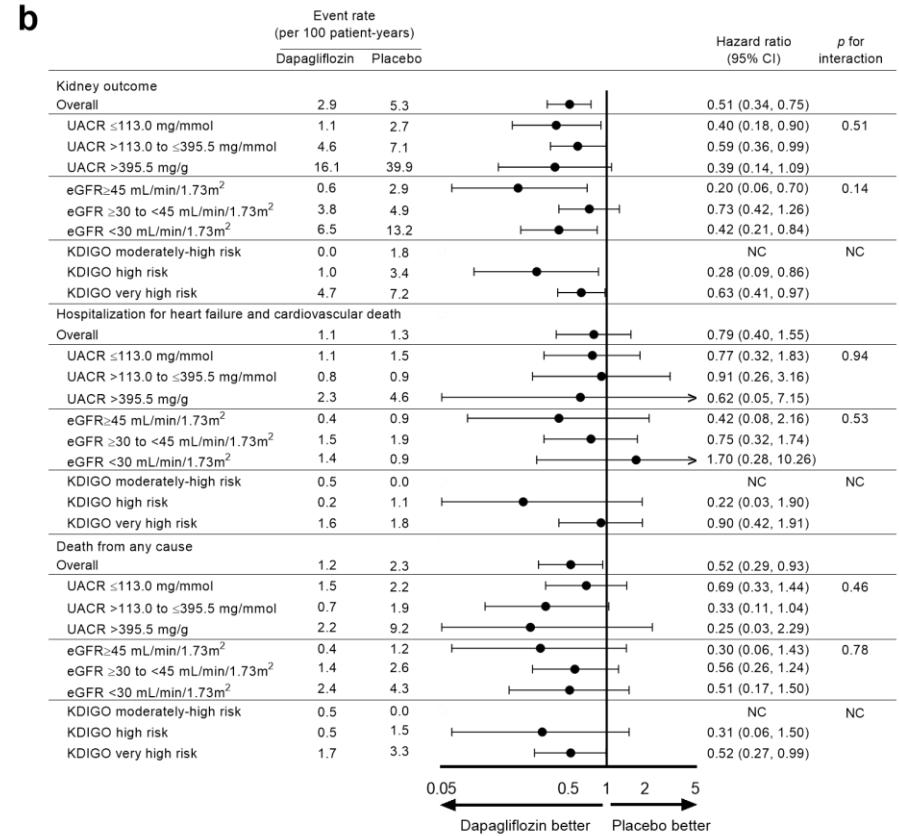

The kidney outcome is a composite of a eGFR decline of at least 50%, end-stage kidney disease or kidney death.

eGFR = estimated glomerular filtration rate; NC = not computed; UACR = urinary albumin-to-creatinine ratio.

**ESM Fig 2: Effects of dapagliflozin on eGFR slope (total, acute and chronic) by baseline UACR, KDIGO and eGFR risk categories**

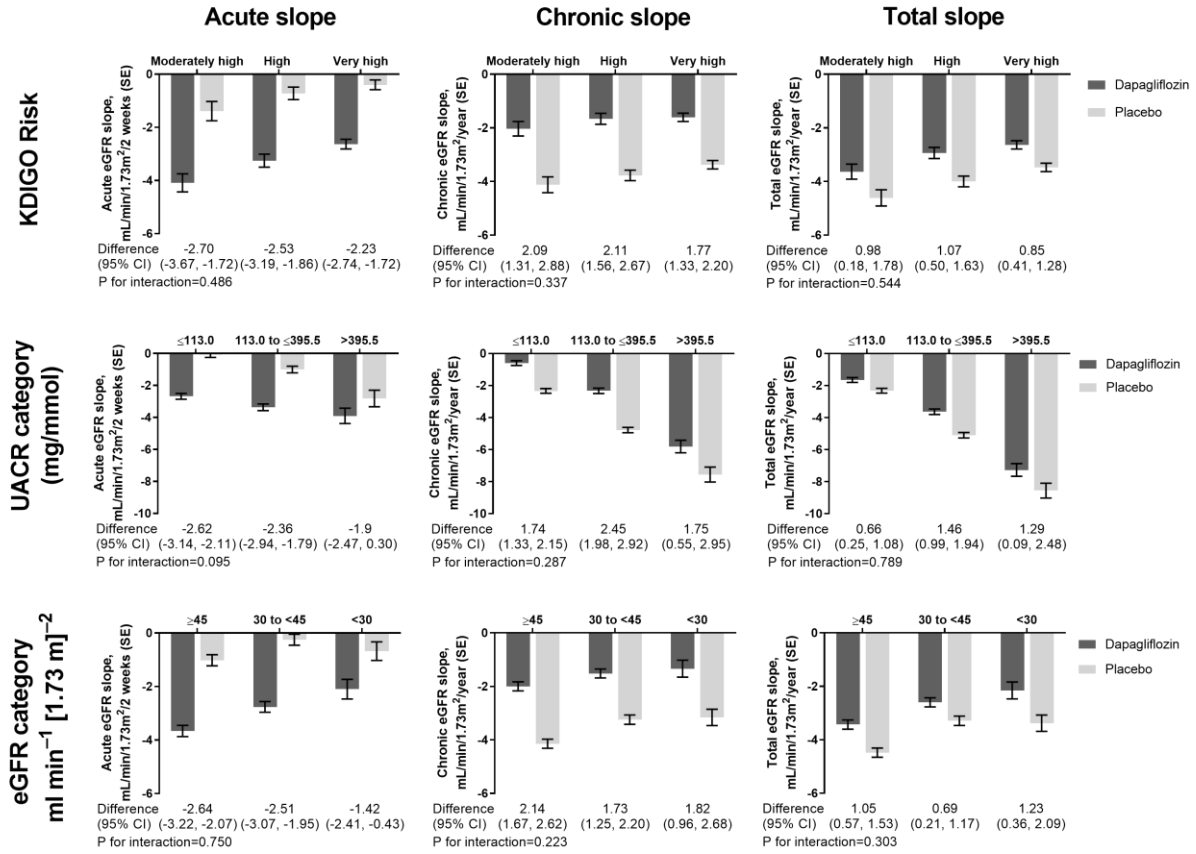

eGFR = estimated glomerular filtration rate; UACR = urinary albumin-to-creatinine ratio

**ESM Fig 3: Relative and absolute effects of dapagliflozin on the primary and secondary outcomes across different subgroups of UACR and eGFR.** Figure shows the relative effect and absolute risk reduction.

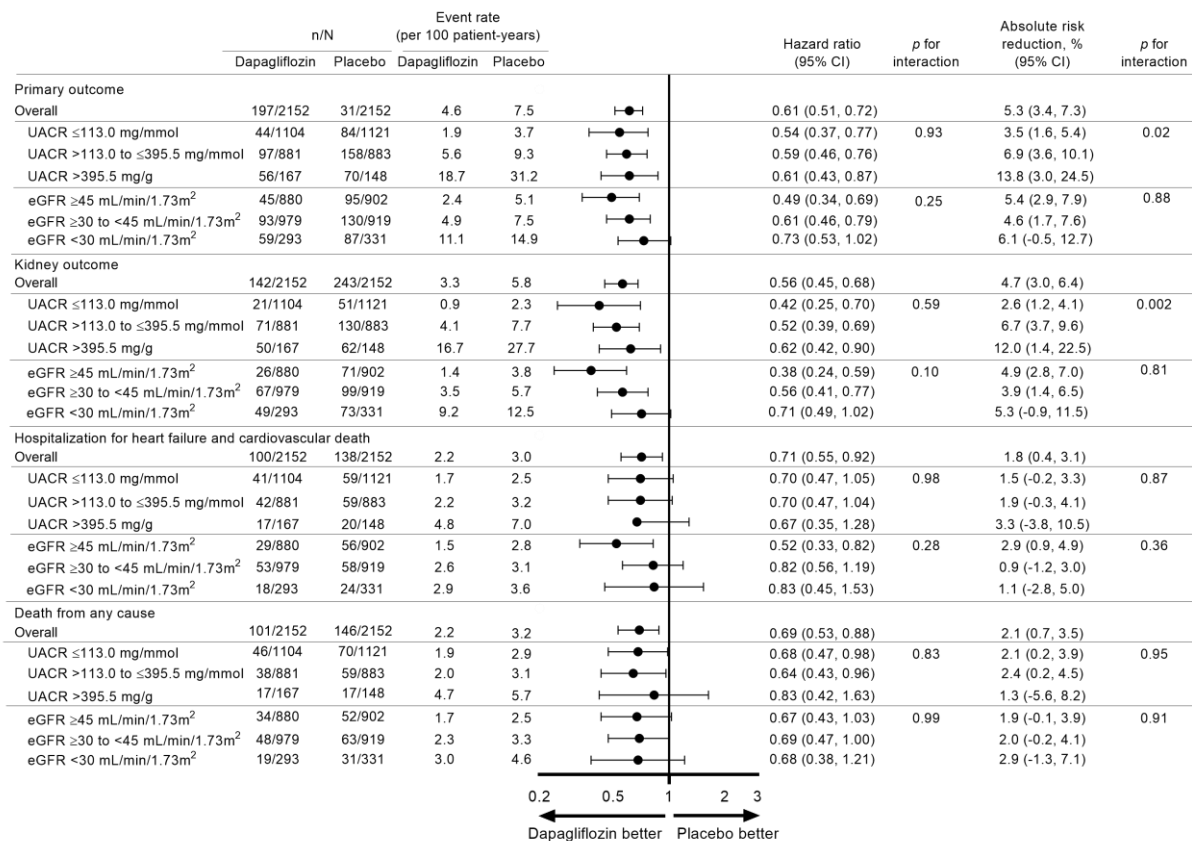

The primary composite outcome is a composite of an eGFR decline of ≥50%, end-stage kidney disease or death from kidney or cardiovascular causes. The kidney composite outcome is a composite of a eGFR decline of ≥50%, end-stage kidney disease or death from kidney causes. eGFR = estimated glomerular filtration rate; UACR = urinary albumin:creatinine ratio.

**ESM Fig 4: Effects of dapagliflozin on the primary composite outcome in patients with an UACR above and below 33.9 mg/mmol (300 mg/g) and eGFR above and below 60 mL/min/1.73m<sup>2</sup>**

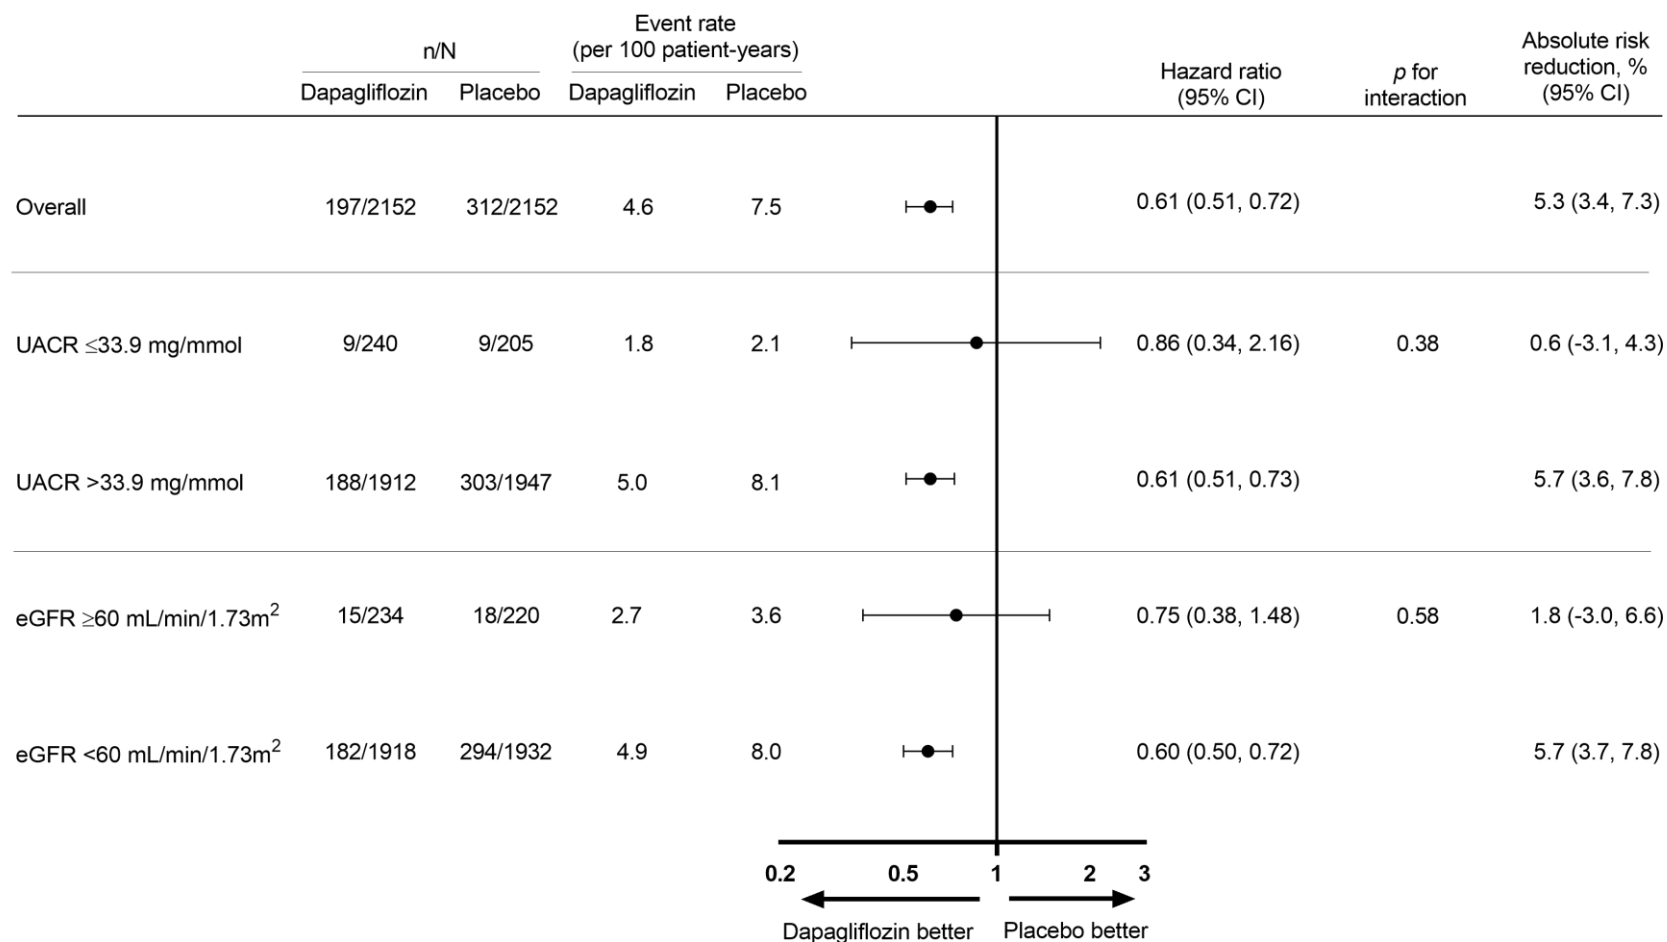

eGFR = estimated glomerular filtration rate; UACR = urinary albumin:creatinine ratio.
